# Supplementary material for: A Systematic Review to Define the Multi-Faceted Role of Lysine Methyltransferase SETD7 in Cancer
Source: MDPI journal article supplement (doi:10.3390/cancers14061414), 2022-03-10
Supplement: s1 [file s1]

**Supplementary Table S1.** Studies excluded after full text analysis and motives. Underlined studies were mentioned in the main text when appropriate, and their findings were integrated into the pathway analysis.

| PMID            | Exclusion criteria                                                                                                                                                                                                                                   |
|-----------------|------------------------------------------------------------------------------------------------------------------------------------------------------------------------------------------------------------------------------------------------------|
| 18650421        | diabetes and inflammation, not cancer                                                                                                                                                                                                                |
| <u>20121546</u> | <u>gallbladder cancer, SETD7 was downregulated by silencing T-Cadherin. No functional nor association studies regarding SETD7 or SETD7-induced methylation</u>                                                                                       |
| <u>21115810</u> | <u>SETD7 methylates MYPT1, no functional nor association studies regarding SETD7 or SETD7-induced methylation in cancer cells or tissues, methods poorly described</u>                                                                               |
| <u>27913949</u> | <u>prostate, no functional nor association studies regarding SETD7 or SETD7-induced methylation</u>                                                                                                                                                  |
| 26861389        | it doesn't focus neither on SETD7 nor cancer. SETD7 was found to be related with serum lycopene concentrations in a healthy group of amish people                                                                                                    |
| <u>25189356</u> | <u>SETD7 was found mutated in prostate cancer. No functional nor further studies were conducted</u>                                                                                                                                                  |
| 30442713        | SETD7 methylates SOX2, however, no functional nor association studies regarding SETD7 or SETD7-induced methylation were performed. Mouse Embryonic Fibroblasts, HEK293, ovarian cancer cells PA-1                                                    |
| 29358331        | SETD7 methylates SOX2. No functional nor association studies regarding SETD7 or SETD7-induced methylation, however they assess cells growth by looking at the cells under microscope. Mouse Embryonic Fibroblasts, HEK293, ovarian cancer cells PA-1 |
| <u>28534506</u> | <u>SETD7 methylates Hlf1a, no functional nor association studies regarding SETD7 or SETD7-induced methylation were performed in cancer cells or tissues</u>                                                                                          |
| 25681344        | SETD7 in Hepatitis C virus (HCV) infection, Huh7.5.1, Huh7, and L02 (normal human hepatic cell line), no functional studies                                                                                                                          |
| <u>24492612</u> | <u>SETD7 methylates Dnmt1, no functional nor association studies regarding SETD7 or SETD7-induced methylation were performed</u>                                                                                                                     |
| 22820736        | SETD7 methylates FOXO3. No functional nor association studies regarding SETD7 or SETD7-induced methylation                                                                                                                                           |
| 22007908        | no functional nor association studies regarding SETD7 or SETD7-induced methylation                                                                                                                                                                   |
| 21440447        | SETD7 inhibitors, no functional nor association studies regarding SETD7 or SETD7-induced methylation                                                                                                                                                 |
| 19864627        | SETD7 methylates p65 and is required for the expression of a subset of NF-kappaB target genes in response to TNFalpha stimulation. No functional nor association studies regarding SETD7 or SETD7-induced methylation, HeLa cells                    |
| <u>18471979</u> | <u>SETD7 methylates ERa, no functional nor association studies regarding SETD7 or SETD7-induced methylation were performed</u>                                                                                                                       |
| <u>17108971</u> | <u>SETD7-mediated methylation of p53 K372 inhibits Smyd2-mediated methylation of p53 K370. No functional nor association studies regarding SETD7 or SETD7-induced methylation</u>                                                                    |

|                 |                                                                                                                                                                                                                                                                                                                                                                                                                                        |
|-----------------|----------------------------------------------------------------------------------------------------------------------------------------------------------------------------------------------------------------------------------------------------------------------------------------------------------------------------------------------------------------------------------------------------------------------------------------|
| <u>15525938</u> | <u>SETD7 methylates p53 positively affecting its stability and restricting it to the nucleus. No functional nor association studies regarding SETD7 or SETD7-induced methylation</u>                                                                                                                                                                                                                                                   |
| 32126499        | SETD7 inhibitors, no studies performed in cells                                                                                                                                                                                                                                                                                                                                                                                        |
| 29869845        | SETD7 inhibitors, no studies performed in cells                                                                                                                                                                                                                                                                                                                                                                                        |
| 28389916        | technique development, SETD7 inhibitors, no cells used                                                                                                                                                                                                                                                                                                                                                                                 |
| 24650704        | SETD7 inhibitors, no <i>in vitro</i> nor <i>in vivo</i> studies, no functional assays nor association analysis                                                                                                                                                                                                                                                                                                                         |
| 32173197        | focus on SETD7 inhibitors, cell proliferation assay used to test inhibitor's biological function in MCF7 breast cancer cells, but no controls were used                                                                                                                                                                                                                                                                                |
| 29498708        | SETD7 inhibitors, cell proliferation assay using MCF7 (breast cancer), HL60 (human leukemia cell line), MV4-11 (human biphenotypic B myelomonocytic leukemia), Kasumi-1 (leukemic cell line), U937 (human myeloid leukaemia cell line), THP1 (human monocytic cell line derived from an acute monocytic leukemia patient) and Jurkat (human T lymphocyte cells that are used to study acute T cell leukemia) cell lines, no controls!! |
| <u>21855805</u> | <u>p53 is methylated by SETD7, not cancer cells, <i>in vivo</i> experiments and <i>in vitro</i> using mouse embryonic fibroblasts</u>                                                                                                                                                                                                                                                                                                  |
| <u>18280244</u> | <u>p53 is methylated by SETD7, not cancer cells, <i>in vivo</i> experiments and <i>in vitro</i> using mouse embryonic fibroblasts</u>                                                                                                                                                                                                                                                                                                  |
| 31035088        | airway smooth muscle, functional studies (proliferation and invasion) but not cancer, primary cell culture from mice, mouse embryonic fibroblasts                                                                                                                                                                                                                                                                                      |
| 30674889        | problematic cell line used! focus molecule of the study isn't SETD7. SETD7 acts as a co-factor of ISL1 and links to ZEB1 <i>in vitro</i> (ChIP)                                                                                                                                                                                                                                                                                        |
| <u>30396921</u> | <u>no functional nor association studies regarding SETD7 or SETD7-induced methylation, however SETD7 is the focus; SETD7 knockdown affects a large number of genes expression in LNCaP cell line</u>                                                                                                                                                                                                                                   |
| 28557056        | not cancer, SETD7 is the focus, <i>in vivo</i> experiments in mice, NCTC 2472 cells, Cyproheptadine (10-80 nmol, 1-6h) used as SETD7 antagonist                                                                                                                                                                                                                                                                                        |
| 33305533        | not cancer (myoblasts)                                                                                                                                                                                                                                                                                                                                                                                                                 |
