# Supplementary material for: A Systematic Review to Define the Multi-Faceted Role of Lysine Methyltransferase SETD7 in Cancer
Source: MDPI journal article supplement (doi:10.3390/cancers14061414), 2022-03-10
Supplement: s1 [file s1]

Supplementary Table S2. Summary of the characteristics of each study.

| Study                             | Type of Cancer                         | Cell cultures                                                                               | Functional studies                                                                                    |                                                |                        |                                                       |                 |                      |                                           | Expression studies           |                                                                                 |
|-----------------------------------|----------------------------------------|---------------------------------------------------------------------------------------------|-------------------------------------------------------------------------------------------------------|------------------------------------------------|------------------------|-------------------------------------------------------|-----------------|----------------------|-------------------------------------------|------------------------------|---------------------------------------------------------------------------------|
|                                   |                                        |                                                                                             | Knock-down/<br>Over-expression of<br>SETD7 or SETD7-<br>methylated proteins<br>(time of transfection) | SETD7<br>Inhibitor<br>(concentration,<br>time) | <i>In vivo</i> studies | <i>In vitro</i> Functional<br>studies                 | Other<br>assays | SETD7 antibody       | Tumour-<br>promoting/<br>suppressing role | Public online<br>database(s) | Own human<br>patient cohort<br>(analysis<br>technique)                          |
|                                   |                                        |                                                                                             |                                                                                                       |                                                |                        |                                                       |                 |                      |                                           |                              |                                                                                 |
| Zipin-Roitman A et al., 2017 [33] | Acute myeloid leukemia                 | TEX, OCI-AML2, AML-193, Jurkat cells and Primary AML and chronic myelogenous leukemia cells | NA                                                                                                    | (R)-PFI-2 (10uM)                               | NA                     | Trypan Blue                                           | NA              | not specified        | Tumour-promoting                          | NA                           | NA                                                                              |
| Gu Y et al., 2017 [31]            | Acute myeloid leukemia and Lung Cancer | NB4, HEL, HL-60, KG-1, KG-1a, THP-1, H1299, A-549                                           | Over-expression and knock-down by shRNAs (48h)                                                        | NA                                             | NA                     | Annexin V/PI, Hoechst 33342 staining                  | NA              | 2813, Cell Signaling | Tumour-promoting/-suppressoring           | NA                           | Bone marrow aspirates from 35 AML patients and 8 healthy donors<br><br>(RT-PCR) |
| Xie H et al., 2020 [34]           | Bladder cancer                         | T24, UM-UC-3, SV-HUC-1                                                                      | Over-expression and knock-down by siRNAs (48-72h)                                                     | NA                                             | NA                     | Transwell assay, wound healing assay                  | IP              | ab14820, Abcam       | Tumour-suppressing                        | TCGA                         | NA                                                                              |
| Song Y et al., 2016 [40]          | Breast cancer                          | MCF-10A, BT-549, MDA-MB-468, MDA-MB-231, MCF-7                                              | Over-expression and knock-down by shRNAs (2 weeks selection)                                          | NA                                             | NA                     | Transwell assay, MTT, colony formation assay, IF ki67 | NA              | Santa Cruz Biotech   | Tumour-suppressing                        | NA                           | 79 normal breast and 79 BC tissues<br><br>(RT-PCR)                              |

|                                 |                 |                                                         |                                                         |                         |                                                                                      |                                                                                                                                   |                                                  |                                              |                    |                                                                          |                                                                 |
|---------------------------------|-----------------|---------------------------------------------------------|---------------------------------------------------------|-------------------------|--------------------------------------------------------------------------------------|-----------------------------------------------------------------------------------------------------------------------------------|--------------------------------------------------|----------------------------------------------|--------------------|--------------------------------------------------------------------------|-----------------------------------------------------------------|
| Si W et al., 2020 [45]          | Breast cancer   | MCF-7, MDA-MB-231, MDA-MB-468, T-47D, UACC-812, MCF-10A | Knock-down by shRNA                                     | NA                      | NA                                                                                   | Transwell assay, cck-8, colony formation assay                                                                                    | Co-IP, ChIP-seq                                  | ab14820, abcam                               | Tumour-promoting   | Human Protein Atlas, GEO (GSE9893 and GSE12276) and Kaplan Mayer plotter | NA                                                              |
| Huang R et al., 2017 [44]       | Breast cancer   | MDA-MB-231, MCF-7, HEK293T                              | Knock-down by shRNAs (48h)                              | NA                      | NA                                                                                   | cck-8, Annexin V, GSH and GSSG Assay and Reactive Oxygen Species Assay Kit                                                        | Dual-luciferase assay                            | Proteintech                                  | Tumour-promoting   | TCGA                                                                     | NA                                                              |
| Zhang Y et al., 2016 [43]       | Breast cancer   | ZR-75-1, MCF-7, MDA-MB-231, HUVEC, HEK293T              | Knock-down by shRNA (2 months selection) or siRNA (48h) | NA                      | Xenograft model: Tumor size measured using calipers and Tumor volume calculated      | Chick chorioallantoic membrane assay, Tube formation assay, Wound healing kit, cell proliferation se assay, assay (not specified) | human VEGF ELISA, Luciferase assays, co-IP, ChIP | SAB1306218, Sigma-Aldrich                    | Tumour-promoting   | NA                                                                       | 80 BC patients<br><br>(IHC)                                     |
| Montenegro MF et al., 2016 [36] | Breast cancer   | MCF-7, MDA-MB-231                                       | Knock-down by siRNA (24-48h)                            | (R)-PFI-2 (50uM, 3days) | Xenograft model: primary tumors and metastases analyzed using IVIS Imaging System    | Wound healing assay, flow citometry to access stemness markers, colorimetric assay for mitochondrial function using XTT           | ChIP                                             | ab124708, Abcam                              | Tumour-suppressing | NA                                                                       | 77 BC samples and 10 benign tumours<br><br>(RT-PCR, WB and IHC) |
| Takemoto Y et al., 2016 [21]    | Breast cancer   | MCF-7                                                   | Knock-down by siRNA (48h)                               | cyproheptadine          | Xenograft model: Tumor diameters measured with a caliper and tumor volume calculated | Cell counting                                                                                                                     | NA                                               | Rabbit polyclonal, Cell Signaling Technology | Tumour-promoting   | NA                                                                       | NA                                                              |
| Shen C et al., 2015 [48]        | Cervical cancer | HeLa, HEK293T                                           | Knock-down by siRNA (48h) or shRNAs                     | NA                      | NA                                                                                   | count clones by crystal violet                                                                                                    | IP                                               | Upstate Biotechnology                        | Tumour-suppressing | NA                                                                       | NA                                                              |

|                           |                                |                                                                                                |                                                                                                                                           |    |                                          |                                                     |                |                                                                                                                                                                              |                    |                                                                     |                                                                                                                                                                                                                |
|---------------------------|--------------------------------|------------------------------------------------------------------------------------------------|-------------------------------------------------------------------------------------------------------------------------------------------|----|------------------------------------------|-----------------------------------------------------|----------------|------------------------------------------------------------------------------------------------------------------------------------------------------------------------------|--------------------|---------------------------------------------------------------------|----------------------------------------------------------------------------------------------------------------------------------------------------------------------------------------------------------------|
| Wu XN et al., 2017 [49]   | Cervical cancer                | HeLa, HEK293T                                                                                  | Knock-out of SETD7, YY2 or LSD1 by CRISPR/cas9 and Over-expression of YY2 or YY2 (K247R) (48h)                                            | NA | Xenograft model: Tumor weight assessment | cell counting and colony formation assay            | ChIP, ChIP-seq | 07–314, Upstate                                                                                                                                                              | Tumour-suppressing | NA                                                                  | NA                                                                                                                                                                                                             |
| Hong X et al., 2018 [53]  | Colorectal and gastric cancers | LOVO, RKO, HCT 116, SW480, HEK293T, MKN45, MEFs and a normal human intestinal epithelial cells | Knock-down by shRNA (2 weeks selection); RioK1-K411R and K413R mutants were introduced using the QuikChange site-directed mutagenesis kit | NA | Xenograft model: Tumor volume            | Transwell assay, wound healing assay, CCK-8 and MTT | IP             | homemade rabbit anti-SETD7 polyclonal antibody was raised against recombinant GST-SETD7 protein and mouse anti-SETD7 monoclonal antibodies from Millipore and Cell Signaling | Tumour-suppressing | NA                                                                  | 104 pairs of CRC samples<br><br>(IHC)                                                                                                                                                                          |
| Duan B et al., 2018 [42]  | Colorectal cancer              | HCT 116, RKO                                                                                   | Knock-down by siRNA (24-48h)                                                                                                              | NA | NA                                       | MTT, PI, Annexin V                                  | NA             | 24840, Proteintech                                                                                                                                                           | Tumour-promoting   | TCGA and Geo (GSEs not specified) for CRC, GC, HCC, PTC, LCa and BC | serum samples from 115 paired pre- and post-operative CRC, 38 colorectal polyps, and 38 healthy control patients<br><br>(ELISA)<br><br>176 CRC and 20 colorectal polyps and para-cancerous tissue<br><br>(IHC) |
| Wang LQ et al., 2018 [54] | Colorectal cancer              | HCT 116, HEK293FT                                                                              | Knock-down by siRNA (48h)                                                                                                                 | NA | NA                                       | Flow citometry to access stemness markers           | NA             | Cell Signaling Technology                                                                                                                                                    | Tumour-suppressing | TCGA                                                                | NA                                                                                                                                                                                                             |

|                             |                                    |                                                                                              |                                                  |                              |    |                                                                      |                        |                                                        |                    |                           |                                                                               |
|-----------------------------|------------------------------------|----------------------------------------------------------------------------------------------|--------------------------------------------------|------------------------------|----|----------------------------------------------------------------------|------------------------|--------------------------------------------------------|--------------------|---------------------------|-------------------------------------------------------------------------------|
| Zhang SL et al., 2020 [55]  | Colorectal cancer                  | HCT 116, SW480                                                                               | Over-expression and knock-down by siRNA (48h)    | NA                           | NA | Transwell assay, wound healing assay, cck-8                          | Co-IP                  | NB100-56664SS, Sigma                                   | Tumour-suppressing | NA                        | 54 CRC and adjacent tissues (IHC)                                             |
| Vasileva E et al., 2020 [6] | Colorectal cancer                  | HCT 116, HEK293T                                                                             | Knock-out by CRISPR/cas9                         | NA                           | NA | PI, Annexin V                                                        | IP                     | 2813s, Cell Signaling                                  | Tumour-suppressing | GEO (GSE39582)            | NA                                                                            |
| Liu Z et al., 2019 [51]     | Colorectal cancer                  | HCT 116, Co-115, SW48                                                                        | Knock-down by shRNAs (48h)                       | Resveratrol (10-50uM, 24h)   | NA | CellTiter-Glo Luminescent cell viability assay                       | Luciferase assay       | 2813                                                   | Tumour-suppressing | GEO (GSE17537: 244653_at) | NA                                                                            |
| Francis NJ et al, 2012 [18] | Colorectal cancer                  | HCT 116                                                                                      | NA                                               | 610930-N (52-104 µM, 24-48h) | NA | sulforhodamine B                                                     | ELISA assay            | NA                                                     | Tumour-promoting   | NA                        | NA                                                                            |
| Xie Q et al., 2011 [50]     | Colorectal cancer and Osteosarcoma | U2OS, HCT 116                                                                                | Over-expression and knock-down by siRNA (36-48h) | NA                           | NA | Colony formation assay, Annexin V                                    | Luciferase assay       | Not specified                                          | Tumour-suppressing | NA                        | NA                                                                            |
| Zhou J et al., 2015 [56]    | Epithelial ovarian cancer          | OVCAR-3, SKOV3, NOE095, hOSEpiC                                                              | Over-expression and knock-down by siRNAs (48h)   | NA                           | NA | Transwell assay, wound healing assay, count clones by crystal violet | Luciferase assay       | mouse, Abcam                                           | Tumour-promoting   | NA                        | 60 EOC and their adjacent normal tissues (qPCR)                               |
| Akiyama Y et al., 2016 [57] | Gastric cancer                     | AGS, GCIY, HSC-43, HSC-44PE, HSC-57, HSC-60, NUGC-4, KATO-III, MKN7, MKN45, MKN74, TGBC11TKB | Knock-down by siRNA (48-72h)                     | NA                           | NA | Transwell assay, cck-8                                               | qChIP                  | Mouse monoclonal,clone 5F2.3, 04-0805, Merck Millipore | Tumour-suppressing | NA                        | 376 primary GCs (IHC)                                                         |
| Li C et al., 2020 [58]      | Glioma                             | HEB and U251                                                                                 | Knock-down by siRNA                              | NA                           | NA | Cck-8, transwell assay                                               | ChIP, Luciferase assay | NA                                                     | Tumour-suppressing | NA                        | 20 pairs of glioma tissue samples and adjacent non-tumorous tissues (RT-qPCR) |

|                          |                               |                                                            |                                                                                    |                |                                                                                                                                    |                                                                                  |        |                                  |                    |                                                                                        |                                                                                                                                                             |
|--------------------------|-------------------------------|------------------------------------------------------------|------------------------------------------------------------------------------------|----------------|------------------------------------------------------------------------------------------------------------------------------------|----------------------------------------------------------------------------------|--------|----------------------------------|--------------------|----------------------------------------------------------------------------------------|-------------------------------------------------------------------------------------------------------------------------------------------------------------|
| Wang H et al., 2021 [59] | Hepatocellular carcinoma      | Hep3B, Huh7, HCCLM3                                        | Over-expression by SETD7 expressing vectors and knock-down by siRNA (48h)          | NA             | NA                                                                                                                                 | Cck-8, EdU assay, transwell assay and wound healing assay                        | RNA IP | Mouse monoclonal, ab14820, Abcam | Tumour-suppressing | NA                                                                                     | 100 primary HCC (complicating with PVTT, n = 15; without PVTT, n = 85), 100 corresponding peritumour tissues and 10 normal hepatic samples<br><br>(RT-qPCR) |
| Gu Y et al., 2018 [32]   | Hepatocellular carcinoma      | Huh7                                                       | Knock-down by shRNA (48h)                                                          | MTA (1mM, 24h) | NA                                                                                                                                 | Transwell assay, cck-8                                                           | Co-IP  | 2813, Cell Signaling Technology  | Tumour-promoting   | TCGA: CRC, Head and neck, kidney, LCa, PCa, PTC, uveal; Oncomine: CRC, kidney, AML, BC | 68 HCC and matched adjacent healthy tissues<br><br>(IHC)                                                                                                    |
| Chen Y et al., 2016 [60] | Hepatocellular carcinoma      | NA                                                         | NA                                                                                 | NA             | NA                                                                                                                                 | NA                                                                               | NA     | NA                               | Tumour-promoting   | NA                                                                                     | 20 pairs of HCC and adjacent non-tumorous tissues<br><br>(qRT-PCR and WB)                                                                                   |
| Kim Y et al., 2016 [83]  | Lung cancer and Breast cancer | HEK293T, HeLa, MDA-MB231, MEFs, Lewis lung carcinoma cells | Knock-in mice bearing a methylation-defective <i>Hif1a</i> <sup>KA/KA</sup> allele | NA             | Mice and xenograft models: Tumour volume measured with a formation assay, IF of calliper and tumour weight (vascularization), ki67 | scratch-cell motility assay, transwell assay, colony formation assay, IF of CD31 | IP     | 2813, Cell Signalling            | Tumour-suppressing | NA                                                                                     | 225 pairs of HCC and adjacent non-tumorous tissues<br><br>(IHC)                                                                                             |

| Author(s) [ref]            | Cancer type                  | Cell lines                                         | Intervention                                                         | Target               | Model                                   | Assays                                                                                                                          | Antibodies                    | Reagents                              | Effects                               | Genotype                                    | Notes                                                        |
|----------------------------|------------------------------|----------------------------------------------------|----------------------------------------------------------------------|----------------------|-----------------------------------------|---------------------------------------------------------------------------------------------------------------------------------|-------------------------------|---------------------------------------|---------------------------------------|---------------------------------------------|--------------------------------------------------------------|
| Cao L et al., 2020 [64]    | Lung cancer                  | A-549, H1299, H661, BEAS-2B                        | Over-expression and knock-down by siRNAs (24-72h)                    | NA                   | NA                                      | Transwell assay, wound healing assay, cck-8                                                                                     | NA                            | ab14820                               | Tumour-suppressing                    | NA                                          | 10 pairs of LCa and matched non-tumour tissues (qPCR and WB) |
| Meng F., 2020 [67]         | Lung cancer                  | 16HBE, A-549, PC-9, HCC827, NCI-H1975 and H1299    | Knock-down by shRNAs (48h)                                           | NA                   | NA                                      | Colony formation assay, EdU assay, transwell assay, TUNEL assay and flow cytometry                                              | RNA IP, Luciferase assay      | Abcam                                 | Tumour-promoting                      | NA                                          | 64 pairs of LCa and adjacent non-tumour tissues (RT-qPCR)    |
| Daks A et al., 2021 [63]   | Lung Cancer                  | A-549, H1299 and patient-derived cells             | Over-expression and knock-down by shRNA and knock-out by CRISPR/cas9 | (R)-PFI-2 (2uM, 48h) | NA                                      | Real-time cell index monitorization (xCELLigence), cell migration assay (CIM-plate), colony formation assay, MTT, PI, Annexin V | NA                            | Cell signalling                       | Tumour-promoting / Tumour-suppressing | GEO (GSE11969)                              | NA                                                           |
| Wang D et al., 2013 [62]   | Lung cancer                  | HEK293T, H1299, MEFs                               | Knock-down by siRNA (48h)                                            | NA                   | NA                                      | count clones by crystal violet                                                                                                  | Luciferase assay, co-IP       | Millipore, Cell Signalling Technology | Tumour-suppressing                    | NA                                          | NA                                                           |
| Fu L et al., 2016 [66]     | Lung cancer                  | HEK293T, A-549, NIH-3T3, BEAS-2B                   | Knock-down by siRNA (24h)                                            | NA                   | Xenograft model: Tumour size and volume | Wound healing assay, MTT                                                                                                        | Luciferase assay, co-IP, ChIP | Mouse, Cell signalling                | Tumour-promoting                      | NA                                          | NA                                                           |
| Lezina L et al., 2014 [65] | Lung cancer and osteosarcoma | H1299, H23, H520, H522, H1650, H460, U2OS, HEK-293 | Knock-down by shRNA                                                  | NA                   | NA                                      | PI, BrDU, IF of anti-phospho-Histone H3 (Ser10) (mitotic marker)                                                                | Luciferase assay, ChIP        | not specified                         | Tumour-promoting                      | GEO: 2 LCa datasets (GSE31210 and GSE36471) | NA                                                           |
| Lezina L et al., 2015 [41] | Lung cancer and osteosarcoma | H522, H1650, H1299, U2OS                           | Knock-down by siRNA (48h)                                            | NA                   | NA                                      | DNA damage analysis using reporter constructs; IF of $\gamma$ -H2Ax; comet assay,                                               | NA                            | Cell Signalling                       | Tumour-promoting                      | GEO: BC dataset (GSE22226)                  | NA                                                           |

| Table 1. In vitro studies of SETD7 in cancer cells |                              |                           |                                                                                               |                                                          |           |                                                                                   |                                                       |                             |                    |                  |                                              |
|----------------------------------------------------|------------------------------|---------------------------|-----------------------------------------------------------------------------------------------|----------------------------------------------------------|-----------|-----------------------------------------------------------------------------------|-------------------------------------------------------|-----------------------------|--------------------|------------------|----------------------------------------------|
| Author                                             | Cancer type                  | Cell lines                | SETD7 manipulation                                                                            | Cell viability                                           | Apoptosis | Cell cycle                                                                        | Transcription                                         | Signaling                   | Cell death         | Other            | Notes                                        |
| Kontaki H et al., 2010 [38]                        | Lung cancer and osteosarcoma | H1299, SaOS-2             | Over-expression and knock-down by shRNAs                                                      | NA                                                       | NA        | colony formation assay, PI                                                        | MTT, PI, PARP cleavage and caspase3/7 activity assays | ChIP                        | 07-314, Millipore  | Tumour-promoting | NA                                           |
| Carr SM et al., 2011 [72]                          | Osteosarcoma                 | U2OS, HeLa, SaOS-2        | Over-expression of pRb K810R; SETD7 Knock-down by siRNA (20nM, 72h)                           | NA                                                       | NA        | PI                                                                                | Luciferase assay, IP, ChIP                            | polyclonal, Cell signalling | Tumour-suppressing | NA               | NA                                           |
| Munro S et al., 2010 [71]                          | Osteosarcoma                 | CC42, C2C12, U2OS, SaOS-2 | Over-expression of pRb K873A; SETD7 Knock-down by siRNA (25nM, 24-72h)                        | NA                                                       | NA        | PI                                                                                | Luciferase assay, ChIP                                | polyclonal, Millipore       | Tumour-suppressing | NA               | NA                                           |
| Ivanov GS et al., 2007 [52]                        | Osteosarcoma                 | U2OS, HEK293, H1299       | Knock-down by shRNA                                                                           | NA                                                       | NA        | PI                                                                                | IP                                                    | not specified               | Tumour-suppressing | NA               | NA                                           |
| Liu Q et al., 2015 [74]                            | Osteosarcoma                 | U2OS                      | Knock-down by shRNA and siRNAs                                                                | NA                                                       | NA        | Cell counting                                                                     | Luciferase assay, co-IP, ChIP                         | Millipore                   | Tumour-promoting   | NA               | NA                                           |
| Zhao M et al., 2020 [81]                           | Papillary thyroid carcinoma  | TPC-1, B-CPAP             | Over-expression and knock-down by shRNAs (48h)                                                | NA                                                       | NA        | cck-8, colony formation assay, PI, Annexin V                                      | Luciferase assay                                      | rabbit, Abcam               | Tumour-promoting   | NA               | 15 PTC and neighboring normal tissues (qPCR) |
| Song H et al., 2020 [75]                           | Prostate Cancer              | LNCaP, PC-3, HEK293T      | Over-expression of RORα2 K87R; Induction of SETD7 by transfecting the cells with Hismax-SETD7 | NA                                                       | NA        | CellTiter 96®Aqueous One Solution Reagent                                         | Luciferase assay, ChIP                                | not specified               | Tumour-promoting   | NA               | NA                                           |
| Wang C et al., 2018 [76]                           | Prostate Cancer              | LNCaP, PC-3               | Knock-down by shRNA                                                                           | Phenethyl isothiocyanate (PEITC - 5 µM, 24h) and ursolic | NA        | comet assay, colony formation assay, Intracellular ROS measurement by FACS of CM- | NA                                                    | Cell Signaling Technology   | Tumour-promoting   | NA               | NA                                           |

|                             |                        |                      |                                                                       | acid (UA - 20 μM, 24h)               |                                                   | H2DCFDA stained cells                |           |                        |                  |    |                                             |
|-----------------------------|------------------------|----------------------|-----------------------------------------------------------------------|--------------------------------------|---------------------------------------------------|--------------------------------------|-----------|------------------------|------------------|----|---------------------------------------------|
| Gaughan L et al, 2011 [79]  | Prostate Cancer        | HEK293T, LNCaP, PC-3 | knock-down by shRNA (2 weeks selection) and knock-down by siRNA (72h) | NA                                   | NA                                                | WST-1, caspase-3 expression analysis | NA        | clone 5F2.3, Millipore | Tumour-promoting | NA | 76 PCa and 24 benign prostate tissues (IHC) |
| Oudhoff MJ et al., 2016 [8] | Small-intestine cancer | NA                   | Mice knock-out; knock-down by siRNA for cells                         | (S) and (R)-PFI-2 (1-10uM, 30min-4h) | Mice model: Number of tumour, lifespan assessment | Organoid formation                   | ELISA, IP | 2D10, Abcam            | Tumour-promoting | NA | NA                                          |

BC – breast cancer; ChIP – chromatin immunoprecipitation; CRC – colorectal cancer; HCC – hepatocellular carcinoma; IHC – immunohistochemistry; IP – immunoprecipitation; MEFs – mouse embryonic fibroblasts; MTT – 3-(4,5-dimethylthiazol-2-yl)-2,5-diphenyltetrazolium bromide; NA – not applicable; PI – propidium iodide; RT-PCR – reverse transcriptase polymerase chain reaction; PTC – papillary thyroid cancer; PVTT – portal vein tumour thrombus; WB – Western blot; XTT – sodium 3'-[1- (phenylaminocarbonyl)- 3,4- tetrazolium]-bis (4-methoxy6-nitro) benzene sulfonic acid hydrate
